# Supplementary material
Source: publisher figshare collection journal article supplement (https://asha.figshare.com/articles/dataset/_/23418635)

**Supplemental Material S5.** Example CAAST slides used in treatment.

| DOER | ACTION | THEME | OTHER |
|------|--------|-------|-------|
|      |        |       |       |

| DOER | ACTION | THEME | OTHER |
|------|--------|-------|-------|
|      |        |       |       |



Supplement: Supplementary file 1 [file 1]
