# Supplementary material
Source: publisher figshare collection journal article supplement (https://asha.figshare.com/articles/dataset/_/23418635)
Supplement: Supplementary file 2 [file 1]

## Supplemental Material S2. Instructions for rating interest in picture stimuli.

Examiner/therapist verbatim instructions: "I am going to show you a group of pictures, one picture at a time. We are looking at these pictures to help decide what we might work on in therapy. I want you to tell me how you feel about working on each picture. For instance, would the activity in this picture be something you would participate in or be interested in talking about? (present a PPT slide). As I show you each picture, show me either a green, yellow, or red face to indicate your interest. Show the green face if you **enjoy** or would like to talk about the picture, show the yellow face if you **somewhat** enjoy or would like to talk about the picture, and show the red face if you **do not** enjoy or would not want to talk about the picture."

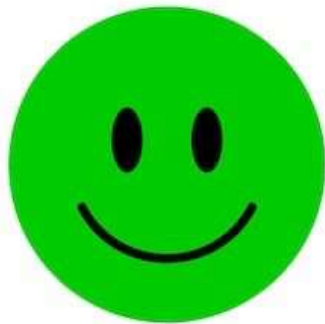

**YES**

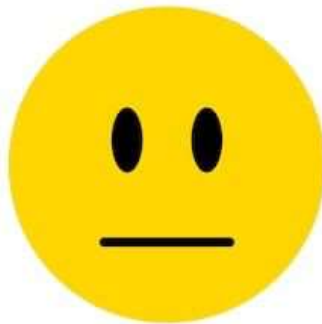

**SURE**

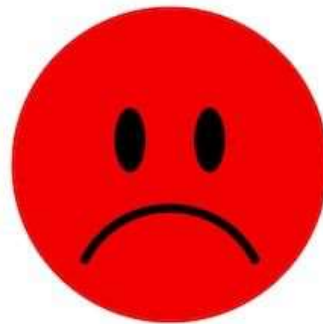

**NO**
