# Supplementary material
Source: publisher figshare collection journal article supplement (https://asha.figshare.com/articles/dataset/_/23418635)
Supplement: Supplementary file 4 [file 1]

### Supplemental Material S3. Experimental stimuli – verbs.

#### P1

|                      |          |          |          |          |          |          |          |         |
|----------------------|----------|----------|----------|----------|----------|----------|----------|---------|
| <b>Treated Set 1</b> | Fishing  | Diving   | Kicking  | Pouring  | Shaving  | Drinking | Shooting | Washing |
| <b>Treated Set 2</b> | Dreaming | Ironing  | Jumping  | Watering | Driving  | Yawning  | Cutting  | Raking  |
| <b>Untreated set</b> | Blowing  | Sleeping | Laughing | Digging  | Touching | Stopping | Bouncing | Dancing |

#### P2

|                      |         |          |         |          |          |          |          |          |
|----------------------|---------|----------|---------|----------|----------|----------|----------|----------|
| <b>Treated Set 1</b> | Waving  | Watching | Singing | Driving  | Catching | Folding  | Shaving  | Touching |
| <b>Treated Set 2</b> | Smiling | Painting | Reading | Bouncing | Petting  | Watering | Laughing | Washing  |
| <b>Untreated set</b> | Dancing | Combing  | Flying  | Sleeping | Skiing   | Dreaming | Biting   | Swinging |

#### P3

|                      |          |         |          |          |          |          |         |          |
|----------------------|----------|---------|----------|----------|----------|----------|---------|----------|
| <b>Treated Set 1</b> | Sleeping | Cooking | Laughing | Building | Pointing | Stirring | Folding | Knocking |
| <b>Untreated set</b> | Shaving  | Fishing | Combing  | Cutting  | Watering | Diving   | Walking | Paiting  |
