# Supplementary material
Source: publisher figshare collection journal article supplement (https://asha.figshare.com/articles/dataset/_/23418635)
Supplement: Supplementary file 5 [file 1]

## **Supplemental Material S1. Pre- and posttreatment discourse samples.**

### **P1**

Verb: Fishing

#### **Pretreatment**

Man is fishing the river, fish on, and worms is in the, in the, can, um pulling the fish out of water//ok

#### **Posttreatment**

The fisherman is fishing for trout, worms are there um, can is um can is full, line is bobber um, fisher, fisher, fisher um, pole is bent, happy go lucky, sitting on a rock, um, worms are in the can, boots are waterproof, shirt is um, vest //ok

### **P2**

Verb: Bouncing

#### **Pretreatment**

Ball ball ball ball ball (bouncing ball) running running money two two running running running boy old

#### **Posttreatment**

Boy shower ball bounce2x ball 7x two / onetwo three four five six / seven eight nine six2x running / foot footballXXX running 3x Friday, Saturday, Sunday, / Monday TuesdaySunday X Thursday Friday so 8x football ball 4x basket/ 2x shoot6x hair comb cuts4x ear / mustachebeardteeth eyebrow nose/X X yellow2x white4x XXX Claus4x book3x X tree / car4x convertible2x hamburger fries coke / me sees4x mit hand mit3x cap/ 2x leaf tummy night4x white and blue3x yellow/ 2x XXX basketball Jazz2x UtahJazz 2x mind2x finger/5x fast3x teeth lily3x flower tulipcake / woodXXXXX cup3x head4x cry sun/ 6x cry 2x wallbeard 2x mustache white 4x XXXXX tree 2x hot3x XXX XXXX

### **P3**

Verb: Stirring

#### **Pretreatment**

Stir the x

#### **Posttreatment**

I see X I see twopersons X I see two onepersons two paper I see one person using a stir X yes that's it
